# Supplementary material for: Two-dimensional ferromagnetic semiconductor Cr2XP: first-principles calculations and Monte Carlo simulations
Source: Royal Society of Chemistry journal article supplement (doi:10.1039/d4cp01665c), 2024-01-01
Supplement: d4cp01665c1.pdf [file d4cp01665c1.pdf]

## Electronic supplementary information

### Two-dimensional ferromagnetic semiconductor Cr<sub>2</sub>XP: First-principles calculations and Monte Carlo simulations

Xiao-Ping Wei<sup>a,b</sup>, Lan-Lan Du<sup>a</sup>, Jiang-Liu Meng<sup>a</sup>, Xiaoma Tao<sup>c</sup>

*<sup>a</sup>The School of Mathematics and Physics, Lanzhou Jiaotong University, Lanzhou 730070, P. R. China.*

*<sup>b</sup>Lanzhou Center for Theoretical Physics, Key Laboratory of Theoretical Physics of Gansu Province, Lanzhou University, Lanzhou, Gansu 730000, P. R. China*

*<sup>c</sup>College of Physical Science and Technology, Guangxi University, Nanning 530004, P. R. China.*

*Email address: weixp2008@lztu.edu.cn (Xiao-Ping Wei<sup>a,b</sup>)*

**Table S1: The optimized lattice constant ( $\text{\AA}$ ) and atomic position of  $\text{Cr}_2\text{XP}$  ( $\text{X}=\text{P, As, Sb}$ ).**

| Materials               | Space group | Lattice constant | Atomic position |                |              |              |
|-------------------------|-------------|------------------|-----------------|----------------|--------------|--------------|
|                         |             |                  | Cr1             | Cr2            | P            | X            |
| $\text{Cr}_2\text{P}_2$ | P4/nmm      | 4.17             | (0,0,0.79)      | (0.5,0.5,0.79) | (0,0,5,0.01) | (0.5,0,0.15) |
| $\text{Cr}_2\text{AsP}$ | P4/nmm      | 4.23             | (0,0,0.08)      | (0.5,0.5,0.82) | (0.5,0,0.15) | (0,0.5,0.10) |
| $\text{Cr}_2\text{SbP}$ | P4/nmm      | 4.29             | (0,0,0.09)      | (0.5,0.5,0.09) | (0.5,0,0.15) | (0,0.5,0.99) |

**The details of calculations for Curie temperature of  $\text{Cr}_2\text{XP}$  ( $\text{X}=\text{P, As, Sb}$ ).**

1. In order to obtain the exchange coupling parameters  $J$  for  $\text{Cr}_2\text{XP}$  magnetic system. Firstly, we perform a collinear calculations to optimized the structure and obtain the magnetic moment of Cr atoms. Subsequently, we calculate the total energies of different magnetic configurations and magnetization direction of  $\text{Cr}_2\text{XP}$ , we can obtain the magnetic anisotropy (MAE).

$$MAE = E_{\parallel} - E_{\perp} \quad (1)$$

According to the spin Hamiltonian of the magnetic system with magnetic anisotropy as follows:

$$H = -\sum_{i,j} J_1 S_i S_j - \sum_{i,k} J_2 S_i S_k - AS_i^z S_i^z \quad (2)$$

Further, the ferromagnetic states of  $\text{Cr}_2\text{XP}$  has the spin Hamiltonian:

$$E(FM) = E_0 - 16J_1 S^2 - 16J_2 S^2 - AS^2 \quad (3)$$

The anti-ferromagnetic1 states (AFM1) of  $\text{Cr}_2\text{XP}$  has the spin Hamiltonian:

$$E(AF1) = E_0 + 16J_1 S^2 - 16J_2 S^2 - AS^2 \quad (4)$$

The anti-ferromagnetic3 states (AFM1) of  $\text{Cr}_2\text{XP}$  has the spin Hamiltonian:

$$E(AF3) = E_0 + 16J_1 S^2 - AS^2 \quad (5)$$

By the eqs. 1~5, we can obtain the  $J_1=13.1\text{meV}$ ,  $17.7\text{ meV}$  and  $83.0\text{ meV}$ ;  $J_2=3.0\text{ meV}$ ,  $6.7\text{ meV}$  and  $6.6\text{ meV}$  for  $\text{Cr}_2\text{P}_2$ ,  $\text{Cr}_2\text{AsP}$  and  $\text{Cr}_2\text{SbP}$ . Finally, we adopt the Heisenberg model combined with the Metropolis algorithm in mcsolver code<sup>[1]</sup> to simulate the magnetization and specific heat capacity as a function of temperature, and find that their the Curie temperature are 278 K, 464 K and 1590 K for  $\text{Cr}_2\text{P}_2$ ,  $\text{Cr}_2\text{AsP}$  and  $\text{Cr}_2\text{SbP}$ , which are evidently higher than room temperature.

[1] Liu L, Ren X., Xie J., et al, Magnetic switches via electric field in BN naoribbons, Appl. Surf. Sci. 480 (2019) 300.
